# Supplementary material
Source: HighWire-hosted journal article supplement (https://bibliotheek.ehb.be/content/suppl/2020/11/13/7.1.e000436)
Supplement: lupus-2020-000436supp001_data_supplement.pdf [file lupus-2020-000436supp001_data_supplement.pdf]

**Supplementary Table 1: SLE patient demographic and clinical characteristics at baseline and follow-up for the entire lupus cohort**

|                                                        | <b>Entire SLE cohort (N = 271)</b> |
|--------------------------------------------------------|------------------------------------|
| <b>Age at last visit, median (Q1, Q3)</b>              | 43.1 (34.1, 53.3)                  |
| <b>Age at enrolment, median (Q1, Q3)</b>               | 37.4 (28.3, 49.4)                  |
| <b>Disease duration at enrolment, median (Q1, Q3)</b>  | 4.1 (1.0, 10.4)                    |
| <b>No. clinic visits, median (Q1, Q3)</b>              | 15 (7, 27)                         |
| <b>Observation period (yrs), median (Q1, Q3)</b>       | 3.9 (1.8, 6.8)                     |
| <b>Female, n (%)</b>                                   | 236 (87.1%)                        |
| <b>Ethnicity</b>                                       |                                    |
| Caucasian, n (%)                                       | 135 (55%)                          |
| Asian, n (%)                                           | 75 (30.7%)                         |
| Other, n (%)                                           | 34 (13.9%)                         |
| <b><u>Medication use during observation period</u></b> |                                    |
| <b>Prednisolone, n (%)</b>                             | 196 (72.3%)                        |
| <b>Cumulative prednisolone (mg), median (Q1, Q3)</b>   | 3809.8 (0.0, 10136.9)              |
| <b>TAM-prednisolone (mg/day), median (Q1, Q3)</b>      | 3.3 (0.0, 7.6)                     |
| <b>Hydroxychloroquine, n (%)</b>                       | 243 (98.8)                         |
| <b>Other Immunosuppressants<sup>#</sup>, n (%)</b>     |                                    |
| <b>Baseline SLEDAI-2K, median (Q1, Q3)</b>             | 4.0 (2.0, 8.0)                     |
| <b>AMS, median (Q1, Q3)</b>                            | 3.2 (1.7, 5.1)                     |
| <b>LLDAS ever attained, n (%)</b>                      | 233 (86.6%)                        |
| <b>LLDAS at last review, n (%)</b>                     | 135 (53.6%)                        |
| <b>Organ damage (baseline) (SDI&gt;0), n (%)</b>       | 146 (53.9%)                        |
| <b>Baseline SDI, median (Q1, Q3)</b>                   | 0.0 (0.0, 1.0)                     |
| <b>Change in SDI &gt;0, n (%)</b>                      | 101 (37.3%)                        |

Data are n (%) or median (Q1, Q3). TAM-prednisolone= time-adjusted mean prednisolone.

AMS=time-adjusted mean Systemic Lupus Erythematosus Disease Activity Index 2000.

SDI=Systemic Lupus International Collaborating Clinics Damage Index. BMI=Body Mass

Index. #Methotrexate, azathioprine, mycophenolate mofetil, mycophenolic acid, leflunomide, ciclosporin, cyclophosphamide, tacrolimus, rituximab or belimumab.
