# Supplementary material
Source: HighWire-hosted journal article supplement (https://bibliotheek.ehb.be/content/suppl/2020/11/13/7.1.e000436)
Supplement: lupus-2020-000436supp002_data_supplement.pdf [file lupus-2020-000436supp002_data_supplement.pdf]

**Supplementary Table 2. Associations of patient characteristics with obesity in SLE patients****(n=116)**

|                          |           | Univariable |               |         | Multivariable |               |         |
|--------------------------|-----------|-------------|---------------|---------|---------------|---------------|---------|
|                          |           | OR          | (95% CI)      | P-value | Adjusted OR   | (95% CI)      | P-value |
| Age at diagnosis (years) | < 40      | 1.00        |               |         | 1.00          |               |         |
|                          | 40-60     | 3.65        | (1.22, 10.94) | 0.02    | 2.83          | (0.76, 10.51) | 0.12    |
|                          | > 60      | 6.84        | (1.29, 36.19) | 0.02    | 11.76         | (1.50, 92.09) | 0.02    |
| Gender                   | Female    | 1.00        |               |         |               |               |         |
|                          | Male      | 0.83        | (0.17, 4.07)  | 0.82    |               |               |         |
| Ethnicity                | Caucasian | 1.00        |               |         | 1.00          |               |         |
|                          | Asian     | 0.28        | (0.08, 1.06)  | 0.06    | 0.4           | (0.09, 1.75)  | 0.23    |
|                          | Other     | 0.21        | (0.02, 1.69)  | 0.14    | 0.18          | (0.02, 1.66)  | 0.13    |

|                         |              |      |              |      |      |              |      |
|-------------------------|--------------|------|--------------|------|------|--------------|------|
| Smoking                 | No           | 1.00 |              |      |      |              |      |
|                         | Yes          | 0.37 | (0.12, 1.19) | 0.10 |      |              |      |
| Received prednisolone   | No           | 1.00 |              |      |      |              |      |
|                         | Yes          | 0.46 | (0.15, 1.38) | 0.17 |      |              |      |
| Cumulative prednisolone | 1st quartile | 1.00 |              |      | 1.00 |              |      |
|                         | 2nd quartile | 0.3  | (0.07, 1.29) | 0.11 | 0.31 | (0.06, 1.70) | 0.18 |
|                         | 3rd quartile | 0.68 | (0.20, 2.30) | 0.54 | 1.83 | (0.37, 8.96) | 0.46 |
|                         | 4th quartile | 0.19 | (0.04, 1.01) | 0.05 | 0.63 | (0.09, 4.52) | 0.65 |
| AMS                     | < 4          | 1.00 |              |      | 1.00 |              |      |
|                         | ≥ 4          | 0.35 | (0.12, 1.05) | 0.06 | 0.57 | (0.14, 2.42) | 0.45 |
| Baseline SDI            | 0            | 1.00 |              |      |      |              |      |
|                         | > 0          | 1.52 | (0.56, 4.12) | 0.41 |      |              |      |

|                                      |     |      |                 |      |  |  |  |
|--------------------------------------|-----|------|-----------------|------|--|--|--|
| Change in SDI ( $\Delta$<br>SDI > 0) | 0   | 1.00 |                 |      |  |  |  |
|                                      | > 0 | 1.13 | (0.42,<br>3.04) | 0.80 |  |  |  |

AMS= time-adjusted mean Systemic Lupus Erythematosus Disease Activity Index 2000.

SDI=Systemic Lupus International Collaborating Clinics Damage Index.

OR, 95% CI and P-value derived from logistic regression model
